# Supplementary material for: A series of complexes constructed by different calix[4]arene derivatives
Source: Royal Society of Chemistry journal article supplement (doi:10.1039/c2ce25650a), 2012-01-01
Supplement: c2ce25650a.pdf [file c2ce25650a.pdf]

## Electronic supplementary information

### **A Series of Complexes Constructed by Different Calix[4]arene Derivatives**

Ying-Ying Liu, Chun Chen, Jian-Fang Ma,\* and Jin Yang\*

Key Lab of Polyoxometalate Science, Department of Chemistry, Northeast Normal  
University, Changchun 130024, People's Republic of China

\* Correspondence authors

E-mail: jianfangma@yahoo.com.cn (J.-F. Ma)

Fax: +86-431-85098620 (J.-F. Ma)

E-mail: yangjinnenu@yahoo.com.cn (J. Yang)

**Table S1.** Selected bond distances (Å) and angles (°) for compounds **1-13**.

|                  |            |                  |            |
|------------------|------------|------------------|------------|
| <b>1</b>         |            |                  |            |
| Mn(1)-N(3)       | 2.204(3)   | Mn(1)-N(2)       | 2.232(3)   |
| Mn(1)-N(6)       | 2.240(3)   | Mn(1)-N(4)       | 2.250(3)   |
| Mn(1)-N(1)       | 2.281(3)   | Mn(1)-N(5)       | 2.295(3)   |
| N(3)-Mn(1)-N(2)  | 108.21(12) | N(3)-Mn(1)-N(6)  | 154.59(12) |
| N(2)-Mn(1)-N(6)  | 93.26(11)  | N(3)-Mn(1)-N(4)  | 75.69(12)  |
| N(2)-Mn(1)-N(4)  | 158.54(11) | N(6)-Mn(1)-N(4)  | 89.36(12)  |
| N(3)-Mn(1)-N(1)  | 86.34(11)  | N(2)-Mn(1)-N(1)  | 73.42(10)  |
| N(6)-Mn(1)-N(1)  | 113.42(12) | N(4)-Mn(1)-N(1)  | 85.99(11)  |
| N(3)-Mn(1)-N(5)  | 89.36(11)  | N(2)-Mn(1)-N(5)  | 97.45(11)  |
| N(6)-Mn(1)-N(5)  | 74.13(12)  | N(4)-Mn(1)-N(5)  | 103.75(11) |
| N(1)-Mn(1)-N(5)  | 168.06(11) |                  |            |
| <b>2</b>         |            |                  |            |
| Cd(1')-N(1)      | 1.564(6)   | Cd(1')-N(5)      | 2.341(5)   |
| Cd(1')-N(2)      | 2.449(5)   | Cd(1')-N(4)      | 2.590(5)   |
| Cd(1')-N(3)      | 2.605(5)   | Cd(1)-N(4)       | 2.319(3)   |
| Cd(1)-N(1)       | 2.326(4)   | Cd(1)-N(6)       | 2.336(4)   |
| Cd(1)-N(2)       | 2.349(4)   | Cd(1)-N(3)       | 2.389(3)   |
| Cd(1)-N(5)       | 2.403(3)   |                  |            |
| N(1)-Cd(1')-N(5) | 115.4(2)   | N(1)-Cd(1')-N(2) | 84.0(2)    |
| N(5)-Cd(1')-N(2) | 104.47(19) | N(1)-Cd(1')-N(4) | 129.9(3)   |
| N(5)-Cd(1')-N(4) | 92.66(17)  | N(2)-Cd(1')-N(4) | 130.0(2)   |
| N(1)-Cd(1')-N(3) | 96.5(2)    | N(5)-Cd(1')-N(3) | 148.1(2)   |
| N(2)-Cd(1')-N(3) | 78.71(15)  | N(4)-Cd(1')-N(3) | 63.92(14)  |
| N(4)-Cd(1)-N(1)  | 109.28(13) | N(4)-Cd(1)-N(6)  | 95.24(13)  |
| N(1)-Cd(1)-N(6)  | 151.31(13) | N(4)-Cd(1)-N(2)  | 156.12(12) |
| N(1)-Cd(1)-N(2)  | 72.52(13)  | N(6)-Cd(1)-N(2)  | 91.15(14)  |
| N(4)-Cd(1)-N(3)  | 71.46(12)  | N(1)-Cd(1)-N(3)  | 85.05(12)  |
| N(6)-Cd(1)-N(3)  | 117.69(12) | N(2)-Cd(1)-N(3)  | 85.19(13)  |
| N(4)-Cd(1)-N(5)  | 98.23(12)  | N(1)-Cd(1)-N(5)  | 89.37(13)  |
| N(6)-Cd(1)-N(5)  | 72.12(13)  | N(2)-Cd(1)-N(5)  | 105.64(13) |
| N(3)-Cd(1)-N(5)  | 165.75(12) |                  |            |
| <b>3</b>         |            |                  |            |
| Ni(1)-N(5)       | 2.037(7)   | Ni(1)-N(6)       | 2.090(5)   |

|                 |          |                 |           |
|-----------------|----------|-----------------|-----------|
| Ni(1)-N(4)      | 2.097(5) | Ni(1)-N(1)      | 2.098(7)  |
| Ni(1)-N(3)      | 2.105(5) | Ni(1)-N(2)      | 2.123(7)  |
| N(5)-Ni(1)-N(6) | 80.1(3)  | N(5)-Ni(1)-N(4) | 92.5(2)   |
| N(6)-Ni(1)-N(4) | 95.3(2)  | N(5)-Ni(1)-N(1) | 172.3(2)  |
| N(6)-Ni(1)-N(1) | 94.8(2)  | N(4)-Ni(1)-N(1) | 93.8(2)   |
| N(5)-Ni(1)-N(3) | 95.5(3)  | N(6)-Ni(1)-N(3) | 173.8(3)  |
| N(4)-Ni(1)-N(3) | 80.4(2)  | N(1)-Ni(1)-N(3) | 90.0(2)   |
| N(5)-Ni(1)-N(2) | 96.0(3)  | N(6)-Ni(1)-N(2) | 91.12(18) |
| N(4)-Ni(1)-N(2) | 170.1(3) | N(1)-Ni(1)-N(2) | 78.2(3)   |
| N(3)-Ni(1)-N(2) | 93.7(2)  |                 |           |

#### 4

|                                              |           |                                |          |
|----------------------------------------------|-----------|--------------------------------|----------|
| Co(1)-N(1)                                   | 2.108(6)  | Co(1)-N(2)                     | 2.162(6) |
| N(1)-Co(1)-N(1) <sup>#1</sup>                | 95.9(2)   | N(1)-Co(1)-N(2) <sup>#1</sup>  | 168.5(2) |
| N(1)-Co(1)-N(2)                              | 76.8(2)   | N(1) <sup>#1</sup> -Co(1)-N(2) | 93.7(2)  |
| N(2) <sup>#1</sup> -Co(1)-N(2) <sup>#2</sup> | 94.64(19) |                                |          |

#### 5

|                                              |            |                                              |           |
|----------------------------------------------|------------|----------------------------------------------|-----------|
| Co(1)-N(1)                                   | 2.1671(17) | Co(1)-N(3)                                   | 2.175(2)  |
| Co(1)-N(2)                                   | 2.1852(18) |                                              |           |
| N(1)-Co(1)-N(1) <sup>#1</sup>                | 98.65(11)  | N(1)-Co(1)-N(3)                              | 165.94(8) |
| N(1) <sup>#1</sup> -Co(1)-N(3)               | 92.57(9)   | N(1)-Co(1)-N(3) <sup>#1</sup>                | 92.57(9)  |
| N(1) <sup>#1</sup> -Co(1)-N(3) <sup>#1</sup> | 165.94(8)  | N(3)-Co(1)-N(3) <sup>#1</sup>                | 77.73(13) |
| N(1)-Co(1)-N(2)                              | 79.22(7)   | N(1) <sup>#1</sup> -Co(1)-N(2)               | 92.58(7)  |
| N(3)-Co(1)-N(2)                              | 91.90(8)   | N(3) <sup>#1</sup> -Co(1)-N(2)               | 97.84(8)  |
| N(1)-Co(1)-N(2) <sup>#1</sup>                | 92.58(7)   | N(1) <sup>#1</sup> -Co(1)-N(2) <sup>#1</sup> | 79.22(7)  |
| N(3)-Co(1)-N(2) <sup>#1</sup>                | 97.84(8)   | N(3) <sup>#1</sup> -Co(1)-N(2) <sup>#1</sup> | 91.90(8)  |
| N(2)-Co(1)-N(2) <sup>#1</sup>                | 167.50(11) |                                              |           |

#### 6

|                  |           |                  |           |
|------------------|-----------|------------------|-----------|
| Zn(1)-N(1)       | 2.016(4)  | Zn(1)-N(6')      | 2.03(3)   |
| Zn(1)-N(5)       | 2.057(7)  | Zn(1)-N(3)       | 2.067(6)  |
| Zn(1)-N(4)       | 2.137(14) | Zn(1)-N(4')      | 2.22(2)   |
| Zn(1)-N(5')      | 2.22(4)   | Zn(1)-N(6)       | 2.300(9)  |
| N(1)-Zn(1)-N(6') | 109.3(9)  | N(1)-Zn(1)-N(5)  | 115.6(4)  |
| N(6')-Zn(1)-N(5) | 84.0(9)   | N(1)-Zn(1)-N(3)  | 113.0(3)  |
| N(6')-Zn(1)-N(3) | 81.4(10)  | N(5)-Zn(1)-N(3)  | 131.4(5)  |
| N(1)-Zn(1)-N(4)  | 96.4(5)   | N(6')-Zn(1)-N(4) | 150.9(10) |

|                                 |            |                                 |            |
|---------------------------------|------------|---------------------------------|------------|
| N(5)-Zn(1)-N(4)                 | 97.3(6)    | N(3)-Zn(1)-N(4)                 | 76.0(5)    |
| N(1)-Zn(1)-N(4')                | 104.3(6)   | N(6')-Zn(1)-N(4')               | 146.2(10)  |
| N(5)-Zn(1)-N(4')                | 78.3(6)    | N(3)-Zn(1)-N(4')                | 89.0(6)    |
| N(4)-Zn(1)-N(4')                | 19.1(6)    | N(1)-Zn(1)-N(5')                | 96.4(11)   |
| N(6')-Zn(1)-N(5')               | 85.6(15)   | N(5)-Zn(1)-N(5')                | 19.8(9)    |
| N(3)-Zn(1)-N(5')                | 150.4(11)  | N(4)-Zn(1)-N(5')                | 105.3(14)  |
| N(4')-Zn(1)-N(5')               | 87.1(14)   | N(1)-Zn(1)-N(6)                 | 94.4(3)    |
| N(6')-Zn(1)-N(6)                | 19.3(8)    | N(5)-Zn(1)-N(6)                 | 79.0(4)    |
| N(3)-Zn(1)-N(6)                 | 98.6(4)    | N(4)-Zn(1)-N(6)                 | 169.1(5)   |
| N(4')-Zn(1)-N(6)                | 155.1(6)   | N(5')-Zn(1)-N(6)                | 74.6(13)   |
| <b>7</b>                        |            |                                 |            |
| Zn(1)-O(25)                     | 1.941(2)   | Zn(1)-O(6) <sup>#1</sup>        | 1.965(2)   |
| Zn(1)-O(23)                     | 1.983(2)   | Zn(1)-O(1W)                     | 2.182(3)   |
| Zn(1)-O(19)                     | 2.210(2)   | Zn(2)-O(18)                     | 1.953(2)   |
| Zn(2)-O(9)                      | 1.9670(19) | Zn(2)-N(1)                      | 2.019(3)   |
| Zn(2)-O(7) <sup>#1</sup>        | 2.030(2)   | Zn(3)-O(25)                     | 1.954(3)   |
| Zn(3)-O(20)                     | 1.972(2)   | Zn(3)-O(5) <sup>#1</sup>        | 2.068(2)   |
| Zn(3)-O(21) <sup>#2</sup>       | 2.145(2)   | Zn(3)-O(22) <sup>#2</sup>       | 2.200(3)   |
| Na(1)-O(12)                     | 2.225(3)   | Na(1)-O(2)                      | 2.326(2)   |
| Na(1)-O(1)                      | 2.407(2)   | Na(1)-O(3)                      | 2.426(3)   |
| Na(1)-O(4)                      | 2.465(2)   | Na(1)-O(8)                      | 2.480(2)   |
| Na(1)-O(10)                     | 2.479(3)   |                                 |            |
| Na(2)-O(14)                     | 2.297(2)   | Na(2)-O(15)                     | 2.369(2)   |
| Na(2)-O(16)                     | 2.302(2)   | Na(2)-O(19)                     | 2.306(2)   |
| Na(2)-O(23)                     | 2.308(3)   | Na(2)-O(13)                     | 2.334(3)   |
| Na(3)-O(2W)                     | 2.391(3)   | Na(3)-O(10)                     | 2.409(3)   |
| Na(3)-O(12)                     | 2.441(3)   | Na(3)-O(18) <sup>#1</sup>       | 2.463(3)   |
| Na(3)-O(8)                      | 2.539(3)   | Na(3)-O(7) <sup>#1</sup>        | 2.620(3)   |
| O(25)-Zn(1)-O(6) <sup>#1</sup>  | 112.84(10) | O(25)-Zn(1)-O(23)               | 131.75(10) |
| O(6) <sup>#1</sup> -Zn(1)-O(23) | 114.93(9)  | O(25)-Zn(1)-O(1W)               | 93.47(11)  |
| O(6) <sup>#1</sup> -Zn(1)-O(1W) | 93.01(10)  | O(23)-Zn(1)-O(1W)               | 90.47(9)   |
| O(25)-Zn(1)-O(19)               | 88.11(10)  | O(6) <sup>#1</sup> -Zn(1)-O(19) | 97.58(9)   |
| O(23)-Zn(1)-O(19)               | 79.48(8)   | O(1W)-Zn(1)-O(19)               | 167.73(9)  |
| O(18)-Zn(2)-O(9)                | 110.08(9)  | O(18)-Zn(2)-N(1)                | 120.89(11) |
| O(9)-Zn(2)-N(1)                 | 104.35(10) | O(18)-Zn(2)-O(7) <sup>#1</sup>  | 111.76(9)  |

|                                               |            |                                                |            |
|-----------------------------------------------|------------|------------------------------------------------|------------|
| O(9)-Zn(2)-O(7) <sup>#1</sup>                 | 107.20(9)  | N(1)-Zn(2)-O(7) <sup>#1</sup>                  | 101.48(10) |
| O(25)-Zn(3)-O(20)                             | 99.76(10)  | O(25)-Zn(3)-O(5) <sup>#1</sup>                 | 103.51(10) |
| O(20)-Zn(3)-O(5) <sup>#1</sup>                | 104.99(10) | O(25)-Zn(3)-O(21) <sup>#2</sup>                | 99.80(10)  |
| O(20)-Zn(3)-O(21) <sup>#2</sup>               | 145.10(10) | O(5) <sup>#1</sup> -Zn(3)-O(21) <sup>#2</sup>  | 98.14(9)   |
| O(25)-Zn(3)-O(22) <sup>#2</sup>               | 154.55(10) | O(20)-Zn(3)-O(22) <sup>#2</sup>                | 91.30(10)  |
| O(5) <sup>#1</sup> -Zn(3)-O(22) <sup>#2</sup> | 95.53(9)   | O(21) <sup>#2</sup> -Zn(3)-O(22) <sup>#2</sup> | 60.36(10)  |
| O(12)-Na(1)-O(2)                              | 150.78(8)  | O(12)-Na(1)-O(1)                               | 94.22(10)  |
| O(2)-Na(1)-O(1)                               | 92.57(8)   | O(12)-Na(1)-O(3)                               | 108.79(11) |
| O(2)-Na(1)-O(3)                               | 83.00(8)   | O(1)-Na(1)-O(3)                                | 140.09(8)  |
| O(12)-Na(1)-O(4)                              | 69.46(8)   | O(2)-Na(1)-O(4)                                | 139.75(8)  |
| O(1)-Na(1)-O(4)                               | 78.29(8)   | O(3)-Na(1)-O(4)                                | 79.94(8)   |
| O(12)-Na(1)-O(8)                              | 86.33(9)   | O(2)-Na(1)-O(8)                                | 66.32(7)   |
| O(1)-Na(1)-O(8)                               | 83.20(8)   | O(3)-Na(1)-O(8)                                | 129.10(8)  |
| O(4)-Na(1)-O(8)                               | 148.02(9)  | O(12)-Na(1)-O(10)                              | 79.71(10)  |
| O(2)-Na(1)-O(10)                              | 80.98(9)   | O(1)-Na(1)-O(10)                               | 151.89(8)  |
| O(3)-Na(1)-O(10)                              | 66.62(7)   | O(4)-Na(1)-O(10)                               | 123.52(9)  |
| O(8)-Na(1)-O(10)                              | 69.11(8)   | O(14)-Na(2)-O(16)                              | 147.51(9)  |
| O(14)-Na(2)-O(19)                             | 71.66(8)   | O(16)-Na(2)-O(19)                              | 140.71(10) |
| O(14)-Na(2)-O(23)                             | 141.02(8)  | O(16)-Na(2)-O(23)                              | 69.90(8)   |
| O(19)-Na(2)-O(23)                             | 71.21(8)   | O(14)-Na(2)-O(13)                              | 85.90(9)   |
| O(16)-Na(2)-O(13)                             | 89.13(8)   | O(19)-Na(2)-O(13)                              | 100.29(9)  |
| O(23)-Na(2)-O(13)                             | 112.02(9)  | O(14)-Na(2)-O(15)                              | 85.42(9)   |
| O(16)-Na(2)-O(15)                             | 82.16(8)   | O(19)-Na(2)-O(15)                              | 105.68(9)  |
| O(23)-Na(2)-O(15)                             | 93.48(9)   | O(13)-Na(2)-O(15)                              | 148.35(9)  |
| O(2W)-Na(3)-O(10)                             | 119.93(11) | O(2W)-Na(3)-O(12)                              | 77.96(10)  |
| O(10)-Na(3)-O(12)                             | 77.04(9)   | O(2W)-Na(3)-O(18) <sup>#1</sup>                | 104.13(10) |
| O(10)-Na(3)-O(18) <sup>#1</sup>               | 135.56(10) | O(12)-Na(3)-O(18) <sup>#1</sup>                | 120.59(11) |
| O(2W)-Na(3)-O(8)                              | 153.59(12) | O(10)-Na(3)-O(8)                               | 69.24(8)   |
| O(12)-Na(3)-O(8)                              | 80.67(8)   | O(18) <sup>#1</sup> -Na(3)-O(8)                | 73.91(8)   |
| O(2W)-Na(3)-O(7) <sup>#1</sup>                | 89.53(11)  | O(10)-Na(3)-O(7) <sup>#1</sup>                 | 80.69(8)   |
| O(12)-Na(3)-O(7) <sup>#1</sup>                | 144.17(11) | O(18) <sup>#1</sup> -Na(3)-O(7) <sup>#1</sup>  | 94.92(8)   |
| O(8)-Na(3)-O(7) <sup>#1</sup>                 | 116.84(8)  |                                                |            |
| <b>8</b>                                      |            |                                                |            |
| Zn(1)-O(25)                                   | 1.947(3)   | Zn(1)-O(6)                                     | 1.973(2)   |
| Zn(1)-O(23) <sup>#1</sup>                     | 1.986(2)   | Zn(1)-O(1W)                                    | 2.161(3)   |

|                                                |            |                                                |            |
|------------------------------------------------|------------|------------------------------------------------|------------|
| Zn(1)-O(19) <sup>#1</sup>                      | 2.240(2)   | Zn(2)-O(18)                                    | 1.950(2)   |
| Zn(2)-O(9)                                     | 1.966(2)   | Zn(2)-O(7) <sup>#1</sup>                       | 2.016(2)   |
| Zn(2)-N(1)                                     | 2.035(3)   | Zn(3)-O(25)                                    | 1.959(3)   |
| Zn(3)-O(20) <sup>#1</sup>                      | 1.972(2)   | Zn(3)-O(5)                                     | 2.107(2)   |
| Zn(3)-O(22) <sup>#2</sup>                      | 2.123(3)   | Zn(3)-O(21) <sup>#2</sup>                      | 2.237(3)   |
| Na(1)-O(12)                                    | 2.229(3)   | Na(1)-O(2)                                     | 2.318(2)   |
| Na(1)-O(1)                                     | 2.415(2)   | Na(1)-O(3)                                     | 2.424(2)   |
| Na(1)-O(4)                                     | 2.474(3)   | Na(1)-O(8)                                     | 2.482(3)   |
| Na(1)-O(10)                                    | 2.506(3)   | Na(2)-O(19)                                    | 2.299(3)   |
| Na(2)-O(14)                                    | 2.300(3)   | Na(2)-O(16)                                    | 2.303(2)   |
| Na(2)-O(23)                                    | 2.311(2)   | Na(2)-O(13)                                    | 2.343(3)   |
| Na(2)-O(15)                                    | 2.369(2)   | Na(3)-O(2W)                                    | 2.377(4)   |
| Na(3)-O(10) <sup>#1</sup>                      | 2.430(3)   | Na(3)-O(12) <sup>#1</sup>                      | 2.435(3)   |
| Na(3)-O(18)                                    | 2.459(3)   | Na(3)-O(8) <sup>#1</sup>                       | 2.573(3)   |
| Na(3)-O(7)                                     | 2.665(3)   |                                                |            |
| O(25)-Zn(1)-O(6)                               | 112.41(10) | O(25)-Zn(1)-O(23) <sup>#1</sup>                | 132.32(9)  |
| O(6)-Zn(1)-O(23) <sup>#1</sup>                 | 114.80(10) | O(25)-Zn(1)-O(1W)                              | 93.06(12)  |
| O(6)-Zn(1)-O(1W)                               | 93.46(11)  | O(23) <sup>#1</sup> -Zn(1)-O(1W)               | 90.47(11)  |
| O(25)-Zn(1)-O(19) <sup>#1</sup>                | 88.45(10)  | O(6)-Zn(1)-O(19) <sup>#1</sup>                 | 98.01(9)   |
| O(23) <sup>#1</sup> -Zn(1)-O(19) <sup>#1</sup> | 78.97(9)   | O(1W)-Zn(1)-O(19) <sup>#1</sup>                | 166.89(10) |
| O(18)-Zn(2)-O(9)                               | 111.16(9)  | O(18)-Zn(2)-O(7) <sup>#1</sup>                 | 113.63(10) |
| O(9)-Zn(2)-O(7) <sup>#1</sup>                  | 107.34(10) | O(18)-Zn(2)-N(1)                               | 118.42(11) |
| O(9)-Zn(2)-N(1)                                | 103.50(10) | O(7) <sup>#1</sup> -Zn(2)-N(1)                 | 101.67(10) |
| O(25)-Zn(3)-O(20) <sup>#1</sup>                | 101.81(10) | O(25)-Zn(3)-O(5)                               | 102.26(10) |
| O(20) <sup>#1</sup> -Zn(3)-O(5)                | 103.90(10) | O(25)-Zn(3)-O(22) <sup>#2</sup>                | 153.10(11) |
| O(20) <sup>#1</sup> -Zn(3)-O(22) <sup>#2</sup> | 94.83(10)  | O(5)-Zn(3)-O(22) <sup>#2</sup>                 | 93.94(10)  |
| O(25)-Zn(3)-O(21) <sup>#2</sup>                | 96.74(11)  | O(20) <sup>#1</sup> -Zn(3)-O(21) <sup>#2</sup> | 149.70(11) |
| O(5)-Zn(3)-O(21) <sup>#2</sup>                 | 95.20(10)  | O(22) <sup>#2</sup> -Zn(3)-O(21) <sup>#2</sup> | 60.12(11)  |
| O(12)-Na(1)-O(2)                               | 151.02(11) | O(12)-Na(1)-O(1)                               | 95.61(11)  |
| O(2)-Na(1)-O(1)                                | 92.78(8)   | O(12)-Na(1)-O(3)                               | 106.68(11) |
| O(2)-Na(1)-O(3)                                | 83.64(8)   | O(1)-Na(1)-O(3)                                | 139.89(8)  |
| O(12)-Na(1)-O(4)                               | 69.03(9)   | O(2)-Na(1)-O(4)                                | 139.95(8)  |
| O(1)-Na(1)-O(4)                                | 77.85(8)   | O(3)-Na(1)-O(4)                                | 79.64(8)   |
| O(12)-Na(1)-O(8)                               | 86.94(10)  | O(2)-Na(1)-O(8)                                | 66.51(8)   |
| O(1)-Na(1)-O(8)                                | 83.50(8)   | O(3)-Na(1)-O(8)                                | 129.61(9)  |

|                                                |            |                                               |            |
|------------------------------------------------|------------|-----------------------------------------------|------------|
| O(4)-Na(1)-O(8)                                | 147.61(8)  | O(12)-Na(1)-O(10)                             | 79.36(11)  |
| O(2)-Na(1)-O(10)                               | 80.34(9)   | O(1)-Na(1)-O(10)                              | 152.21(9)  |
| O(3)-Na(1)-O(10)                               | 66.52(8)   | O(4)-Na(1)-O(10)                              | 123.99(10) |
| O(8)-Na(1)-O(10)                               | 69.03(8)   | O(19)-Na(2)-O(14)                             | 71.70(8)   |
| O(19)-Na(2)-O(16)                              | 141.30(9)  | O(14)-Na(2)-O(16)                             | 146.90(9)  |
| O(19)-Na(2)-O(23)                              | 71.54(9)   | O(14)-Na(2)-O(23)                             | 141.47(10) |
| O(16)-Na(2)-O(23)                              | 70.16(8)   | O(19)-Na(2)-O(13)                             | 100.81(9)  |
| O(14)-Na(2)-O(13)                              | 85.28(9)   | O(16)-Na(2)-O(13)                             | 88.86(9)   |
| O(23)-Na(2)-O(13)                              | 112.67(9)  | O(19)-Na(2)-O(15)                             | 105.47(9)  |
| O(14)-Na(2)-O(15)                              | 85.71(9)   | O(16)-Na(2)-O(15)                             | 82.14(9)   |
| O(23)-Na(2)-O(15)                              | 93.19(9)   | O(13)-Na(2)-O(15)                             | 147.86(9)  |
| O(2W)-Na(3)-O(10) <sup>#1</sup>                | 122.21(13) | O(2W)-Na(3)-O(12) <sup>#1</sup>               | 78.59(12)  |
| O(10) <sup>#1</sup> -Na(3)-O(12) <sup>#1</sup> | 77.08(10)  | O(2W)-Na(3)-O(18)                             | 103.00(11) |
| O(10) <sup>#1</sup> -Na(3)-O(18)               | 134.25(11) | O(12) <sup>#1</sup> -Na(3)-O(18)              | 122.14(12) |
| O(2W)-Na(3)-O(8) <sup>#1</sup>                 | 153.13(14) | O(10) <sup>#1</sup> -Na(3)-O(8) <sup>#1</sup> | 68.74(8)   |
| O(12) <sup>#1</sup> -Na(3)-O(8) <sup>#1</sup>  | 80.78(10)  | O(18)-Na(3)-O(8) <sup>#1</sup>                | 73.98(8)   |
| O(2W)-Na(3)-O(7)                               | 90.16(12)  | O(10) <sup>#1</sup> -Na(3)-O(7)               | 79.72(9)   |
| O(12) <sup>#1</sup> -Na(3)-O(7)                | 143.04(12) | O(18)-Na(3)-O(7)                              | 94.61(9)   |
| O(8) <sup>#1</sup> -Na(3)-O(7)                 | 116.59(9)  |                                               |            |
| <b>9</b>                                       |            |                                               |            |
| Co(1)-O(13)                                    | 2.041(2)   | Co(1)-O(2W)                                   | 2.076(3)   |
| Co(1)-O(10)                                    | 2.086(2)   | Co(1)-O(12)                                   | 2.118(2)   |
| Co(1)-O(1W)                                    | 2.120(2)   | Co(1)-O(8)                                    | 2.138(2)   |
| Co(1)-Na(1)                                    | 3.2360(16) | Co(2)-O(13)                                   | 2.072(2)   |
| Co(2)-O(13) <sup>#1</sup>                      | 2.073(2)   | Co(2)-O(6) <sup>#2</sup>                      | 2.093(2)   |
| Co(2)-O(7) <sup>#1</sup>                       | 2.103(2)   | Co(2)-O(9)                                    | 2.124(2)   |
| Co(2)-O(3W)                                    | 2.174(2)   |                                               |            |
| Na(1)-O(4)                                     | 2.269(3)   | Na(1)-O(8)                                    | 2.312(3)   |
| Na(1)-O(12)                                    | 2.385(3)   | Na(1)-O(2)                                    | 2.368(3)   |
| Na(1)-O(1)                                     | 2.386(3)   | Na(1)-O(3)                                    | 2.389(3)   |
| Na(1)-O(10)                                    | 2.778(3)   |                                               |            |
| O(13)-Co(1)-O(2W)                              | 86.65(10)  | O(13)-Co(1)-O(10)                             | 99.63(10)  |
| O(2W)-Co(1)-O(10)                              | 173.03(10) | O(13)-Co(1)-O(12)                             | 177.78(9)  |
| O(2W)-Co(1)-O(12)                              | 93.91(10)  | O(10)-Co(1)-O(12)                             | 79.94(10)  |
| O(13)-Co(1)-O(1W)                              | 87.92(10)  | O(2W)-Co(1)-O(1W)                             | 93.89(11)  |

|                                               |            |                                               |            |
|-----------------------------------------------|------------|-----------------------------------------------|------------|
| O(10)-Co(1)-O(1W)                             | 89.39(10)  | O(12)-Co(1)-O(1W)                             | 89.90(10)  |
| O(13)-Co(1)-O(8)                              | 96.28(9)   | O(2W)-Co(1)-O(8)                              | 93.74(11)  |
| O(10)-Co(1)-O(8)                              | 82.62(10)  | O(12)-Co(1)-O(8)                              | 85.83(9)   |
| O(1W)-Co(1)-O(8)                              | 171.49(10) | O(13)-Co(2)-O(13) <sup>#1</sup>               | 83.19(9)   |
| O(13)-Co(2)-O(6) <sup>#2</sup>                | 178.01(9)  | O(13) <sup>#1</sup> -Co(2)-O(6) <sup>#2</sup> | 95.15(9)   |
| O(13)-Co(2)-O(7) <sup>#1</sup>                | 89.22(9)   | O(13) <sup>#1</sup> -Co(2)-O(7) <sup>#1</sup> | 95.03(9)   |
| O(6) <sup>#2</sup> -Co(2)-O(7) <sup>#1</sup>  | 92.01(9)   | O(13)-Co(2)-O(9)                              | 93.71(9)   |
| O(13) <sup>#1</sup> -Co(2)-O(9)               | 92.06(9)   | O(6) <sup>#2</sup> -Co(2)-O(9)                | 85.25(9)   |
| O(7) <sup>#1</sup> -Co(2)-O(9)                | 172.61(9)  | O(13)-Co(2)-O(3W)                             | 94.93(9)   |
| O(13) <sup>#1</sup> -Co(2)-O(3W)              | 177.64(9)  | O(6) <sup>#2</sup> -Co(2)-O(3W)               | 86.76(9)   |
| O(7) <sup>#1</sup> -Co(2)-O(3W)               | 83.50(10)  | O(9)-Co(2)-O(3W)                              | 89.48(10)  |
| O(4)-Na(1)-O(8)                               | 146.11(11) | O(4)-Na(1)-O(2)                               | 143.47(10) |
| O(8)-Na(1)-O(2)                               | 69.64(9)   | O(4)-Na(1)-O(12)                              | 69.92(9)   |
| O(8)-Na(1)-O(12)                              | 76.19(9)   | O(2)-Na(1)-O(12)                              | 144.27(10) |
| O(4)-Na(1)-O(1)                               | 83.12(10)  | O(8)-Na(1)-O(1)                               | 97.52(9)   |
| O(2)-Na(1)-O(1)                               | 84.34(9)   | O(12)-Na(1)-O(1)                              | 90.16(9)   |
| O(4)-Na(1)-O(3)                               | 90.32(10)  | O(8)-Na(1)-O(3)                               | 105.37(10) |
| O(2)-Na(1)-O(3)                               | 82.09(9)   | O(12)-Na(1)-O(3)                              | 117.65(10) |
| O(1)-Na(1)-O(3)                               | 147.25(10) | O(4)-Na(1)-O(10)                              | 97.39(10)  |
| O(8)-Na(1)-O(10)                              | 65.71(8)   | O(2)-Na(1)-O(10)                              | 110.18(9)  |
| O(12)-Na(1)-O(10)                             | 62.53(9)   | O(1)-Na(1)-O(10)                              | 150.06(9)  |
| O(3)-Na(1)-O(10)                              | 62.55(8)   |                                               |            |
| <b>10</b>                                     |            |                                               |            |
| Cu(1)-O(8) <sup>#1</sup>                      | 1.938(2)   | Cu(1)-O(12)                                   | 1.971(2)   |
| Cu(1)-O(11) <sup>#2</sup>                     | 1.979(2)   | Cu(1)-O(7) <sup>#3</sup>                      | 1.988(2)   |
| Cu(1)-O(6) <sup>#3</sup>                      | 2.156(2)   | Cu(1)···Cu(1) <sup>#2</sup>                   | 2.632(1)   |
| Cu(2)-O(9)                                    | 1.896(2)   | Cu(2)-O(5)                                    | 1.953(2)   |
| Na(1)-O(9)                                    | 2.255(3)   | Na(1)-O(1)                                    | 2.258(3)   |
| Na(1)-O(3)                                    | 2.278(3)   | Na(1)-O(5)                                    | 2.303(3)   |
| Na(1)-O(2)                                    | 2.383(3)   | Na(1)-O(4)                                    | 2.424(3)   |
| O(8) <sup>#1</sup> -Cu(1)-O(12)               | 90.01(11)  | O(8) <sup>#1</sup> -Cu(1)-O(11) <sup>#2</sup> | 89.20(11)  |
| O(12)-Cu(1)-O(11) <sup>#2</sup>               | 168.60(10) | O(8) <sup>#1</sup> -Cu(1)-O(7) <sup>#3</sup>  | 168.01(10) |
| O(12)-Cu(1)-O(7) <sup>#3</sup>                | 87.64(11)  | O(11) <sup>#2</sup> -Cu(1)-O(7) <sup>#3</sup> | 90.78(10)  |
| O(8) <sup>#1</sup> -Cu(1)-O(6) <sup>#3</sup>  | 99.60(10)  | O(12)-Cu(1)-O(6) <sup>#3</sup>                | 101.38(10) |
| O(11) <sup>#2</sup> -Cu(1)-O(6) <sup>#3</sup> | 89.97(10)  | O(7) <sup>#3</sup> -Cu(1)-O(6) <sup>#3</sup>  | 92.39(9)   |



|                                                |            |                                                |            |
|------------------------------------------------|------------|------------------------------------------------|------------|
| O(9)-Cu(2)-O(5) <sup>#1</sup>                  | 94.94(10)  | O(9)-Cu(2)-O(5)                                | 85.06(10)  |
| <b>11</b>                                      |            |                                                |            |
| Cu(1)-O(21) <sup>#1</sup>                      | 1.932(3)   | Cu(1)-O(11)                                    | 1.950(3)   |
| Cu(1)-O(8)                                     | 1.954(2)   | Cu(1)-O(3W)                                    | 1.955(3)   |
| Cu(2)-O(17) <sup>#2</sup>                      | 1.954(3)   | Cu(2)-O(17)                                    | 1.954(3)   |
| Cu(2)-O(2W)                                    | 1.964(3)   | Cu(2)-O(2W) <sup>#2</sup>                      | 1.964(3)   |
| Cu(2)-O(1W)                                    | 2.226(5)   |                                                |            |
| Cu(3)-O(25)                                    | 1.908(3)   | Cu(3)-O(20)                                    | 1.955(2)   |
| Cu(3)-O(24) <sup>#2</sup>                      | 1.957(3)   | Cu(3)-O(22)                                    | 1.987(3)   |
| Cu(3)-O(12) <sup>#3</sup>                      | 2.377(3)   |                                                |            |
| Cu(4)-O(25)                                    | 1.901(3)   | Cu(4)-O(9)                                     | 1.935(3)   |
| Cu(4)-O(5) <sup>#3</sup>                       | 1.970(3)   | Cu(4)-O(19)                                    | 1.990(3)   |
| Na(1)-O(20)                                    | 2.360(3)   | Na(1)-O(23)                                    | 2.377(3)   |
| Na(1)-O(14)                                    | 2.419(3)   | Na(1)-O(16)                                    | 2.445(3)   |
| Na(1)-O(15)                                    | 2.481(3)   | Na(1)-O(13)                                    | 2.540(3)   |
| Na(1)-O(22)                                    | 2.709(3)   |                                                |            |
| Na(2)-O(11)                                    | 2.247(3)   | Na(2)-O(2)                                     | 2.263(3)   |
| Na(2)-O(4)                                     | 2.304(3)   | Na(2)-O(8)                                     | 2.360(3)   |
| Na(2)-O(1)                                     | 2.381(3)   | Na(2)-O(3)                                     | 2.414(3)   |
| O(21) <sup>#1</sup> -Cu(1)-O(11)               | 92.28(12)  | O(21) <sup>#1</sup> -Cu(1)-O(8)                | 165.54(13) |
| O(11)-Cu(1)-O(8)                               | 82.25(11)  | O(21) <sup>#1</sup> -Cu(1)-O(3W)               | 90.02(12)  |
| O(11)-Cu(1)-O(3W)                              | 167.74(13) | O(8)-Cu(1)-O(3W)                               | 92.63(12)  |
| O(17) <sup>#2</sup> -Cu(2)-O(17)               | 179.9(2)   | O(17) <sup>#2</sup> -Cu(2)-O(2W)               | 85.05(12)  |
| O(17)-Cu(2)-O(2W)                              | 94.94(12)  | O(17) <sup>#2</sup> -Cu(2)-O(2W) <sup>#2</sup> | 94.94(12)  |
| O(17)-Cu(2)-O(2W) <sup>#2</sup>                | 85.05(12)  | O(2W)-Cu(2)-O(2W) <sup>#2</sup>                | 167.09(18) |
| O(17) <sup>#2</sup> -Cu(2)-O(1W)               | 90.05(9)   | O(17)-Cu(2)-O(1W)                              | 90.05(9)   |
| O(2W)-Cu(2)-O(1W)                              | 96.45(9)   | O(2W) <sup>#2</sup> -Cu(2)-O(1W)               | 96.45(9)   |
| O(25)-Cu(3)-O(20)                              | 90.50(11)  | O(25)-Cu(3)-O(24) <sup>#2</sup>                | 95.23(11)  |
| O(20)-Cu(3)-O(24) <sup>#2</sup>                | 172.83(11) | O(25)-Cu(3)-O(22)                              | 172.02(12) |
| O(20)-Cu(3)-O(22)                              | 81.91(11)  | O(24) <sup>#2</sup> -Cu(3)-O(22)               | 92.16(11)  |
| O(25)-Cu(3)-O(12) <sup>#3</sup>                | 91.30(12)  | O(20)-Cu(3)-O(12) <sup>#3</sup>                | 82.70(11)  |
| O(24) <sup>#2</sup> -Cu(3)-O(12) <sup>#3</sup> | 101.43(11) | O(22)-Cu(3)-O(12) <sup>#3</sup>                | 90.18(11)  |
| O(25)-Cu(4)-O(9)                               | 159.98(14) | O(25)-Cu(4)-O(5) <sup>#3</sup>                 | 96.98(12)  |
| O(9)-Cu(4)-O(5) <sup>#3</sup>                  | 92.41(13)  | O(25)-Cu(4)-O(19)                              | 89.60(11)  |
| O(9)-Cu(4)-O(19)                               | 88.29(12)  | O(5) <sup>#3</sup> -Cu(4)-O(19)                | 157.78(12) |

|                                 |            |                                 |            |
|---------------------------------|------------|---------------------------------|------------|
| O(20)-Na(1)-O(23)               | 94.29(11)  | O(20)-Na(1)-O(14)               | 67.54(9)   |
| O(23)-Na(1)-O(14)               | 149.09(12) | O(20)-Na(1)-O(16)               | 156.65(11) |
| O(23)-Na(1)-O(16)               | 66.99(10)  | O(14)-Na(1)-O(16)               | 135.39(10) |
| O(20)-Na(1)-O(15)               | 101.37(11) | O(23)-Na(1)-O(15)               | 119.50(11) |
| O(14)-Na(1)-O(15)               | 89.42(10)  | O(16)-Na(1)-O(15)               | 77.93(10)  |
| O(20)-Na(1)-O(13)               | 108.22(10) | O(23)-Na(1)-O(13)               | 86.78(11)  |
| O(14)-Na(1)-O(13)               | 76.37(10)  | O(16)-Na(1)-O(13)               | 85.43(10)  |
| O(15)-Na(1)-O(13)               | 138.65(10) | O(20)-Na(1)-O(22)               | 60.85(9)   |
| O(23)-Na(1)-O(22)               | 78.20(10)  | O(14)-Na(1)-O(22)               | 110.66(10) |
| O(16)-Na(1)-O(22)               | 100.17(10) | O(15)-Na(1)-O(22)               | 61.03(9)   |
| O(13)-Na(1)-O(22)               | 160.23(11) | O(11)-Na(2)-O(2)                | 136.66(13) |
| O(11)-Na(2)-O(4)                | 70.69(11)  | O(2)-Na(2)-O(4)                 | 151.87(13) |
| O(11)-Na(2)-O(8)                | 67.70(10)  | O(2)-Na(2)-O(8)                 | 69.82(11)  |
| O(4)-Na(2)-O(8)                 | 138.20(11) | O(11)-Na(2)-O(1)                | 110.41(12) |
| O(2)-Na(2)-O(1)                 | 89.38(11)  | O(4)-Na(2)-O(1)                 | 84.24(11)  |
| O(8)-Na(2)-O(1)                 | 106.47(12) | O(11)-Na(2)-O(3)                | 88.17(11)  |
| O(2)-Na(2)-O(3)                 | 88.16(11)  | O(4)-Na(2)-O(3)                 | 86.15(11)  |
| O(8)-Na(2)-O(3)                 | 96.24(11)  | O(1)-Na(2)-O(3)                 | 154.73(13) |
| <b>12</b>                       |            |                                 |            |
| Zn(1)-O(13)                     | 1.978(3)   | Zn(1)-O(5)                      | 2.021(3)   |
| Zn(1)-O(7) <sup>#1</sup>        | 2.080(3)   | Zn(1)-O(1W)                     | 2.112(5)   |
| Zn(1)-O(9)                      | 2.188(3)   | Zn(1)-O(11)                     | 2.322(4)   |
| Zn(2)-O(12) <sup>#2</sup>       | 1.934(3)   | Zn(2)-O(13)                     | 1.951(4)   |
| Zn(2)-O(10)                     | 1.952(3)   | Zn(2)-O(8) <sup>#1</sup>        | 1.967(3)   |
| Na(1)-O(5)                      | 2.294(3)   | Na(1)-O(3)                      | 2.299(3)   |
| Na(1)-O(9)                      | 2.324(3)   | Na(1)-O(1)                      | 2.354(3)   |
| Na(1)-O(4)                      | 2.367(3)   | Na(1)-O(2)                      | 2.413(3)   |
| Na(1)-O(11)                     | 2.860(4)   |                                 |            |
| O(13)-Zn(1)-O(5)                | 173.14(14) | O(13)-Zn(1)-O(7) <sup>#1</sup>  | 94.72(13)  |
| O(5)-Zn(1)-O(7) <sup>#1</sup>   | 91.58(12)  | O(13)-Zn(1)-O(1W)               | 93.04(17)  |
| O(5)-Zn(1)-O(1W)                | 88.70(14)  | O(7) <sup>#1</sup> -Zn(1)-O(1W) | 98.36(16)  |
| O(13)-Zn(1)-O(9)                | 94.20(15)  | O(5)-Zn(1)-O(9)                 | 82.95(11)  |
| O(7) <sup>#1</sup> -Zn(1)-O(9)  | 91.29(12)  | O(1W)-Zn(1)-O(9)                | 167.42(13) |
| O(13)-Zn(1)-O(11)               | 91.59(14)  | O(5)-Zn(1)-O(11)                | 81.65(12)  |
| O(7) <sup>#1</sup> -Zn(1)-O(11) | 165.09(14) | O(1W)-Zn(1)-O(11)               | 94.78(17)  |

|                                |            |                                               |            |
|--------------------------------|------------|-----------------------------------------------|------------|
| O(9)-Zn(1)-O(11)               | 74.76(13)  | O(12) <sup>#2</sup> -Zn(2)-O(10)              | 114.73(14) |
| O(13)-Zn(2)-O(10)              | 105.82(16) | O(12) <sup>#2</sup> -Zn(2)-O(8) <sup>#1</sup> | 102.19(12) |
| O(13)-Zn(2)-O(8) <sup>#1</sup> | 101.82(15) | O(10)-Zn(2)-O(8) <sup>#1</sup>                | 114.69(14) |
| O(5)-Na(1)-O(3)                | 144.99(11) | O(5)-Na(1)-O(9)                               | 74.34(11)  |
| O(3)-Na(1)-O(9)                | 70.78(10)  | O(5)-Na(1)-O(1)                               | 68.77(10)  |
| O(3)-Na(1)-O(1)                | 145.24(11) | O(9)-Na(1)-O(1)                               | 139.83(11) |
| O(5)-Na(1)-O(4)                | 103.34(11) | O(3)-Na(1)-O(4)                               | 90.45(10)  |
| O(9)-Na(1)-O(4)                | 118.06(11) | O(1)-Na(1)-O(4)                               | 86.11(10)  |
| O(5)-Na(1)-O(2)                | 100.65(11) | O(3)-Na(1)-O(2)                               | 81.37(10)  |
| O(9)-Na(1)-O(2)                | 88.07(10)  | O(1)-Na(1)-O(2)                               | 83.67(10)  |
| O(4)-Na(1)-O(2)                | 148.38(11) | O(5)-Na(1)-O(11)                              | 66.02(12)  |
| O(3)-Na(1)-O(11)               | 94.77(12)  | O(9)-Na(1)-O(11)                              | 62.81(10)  |
| O(1)-Na(1)-O(11)               | 113.21(12) | O(4)-Na(1)-O(11)                              | 60.75(10)  |
| O(2)-Na(1)-O(11)               | 149.95(11) |                                               |            |

### 13

|                                                |           |                                   |            |
|------------------------------------------------|-----------|-----------------------------------|------------|
| Pb(1)-O(13)                                    | 2.331(7)  | Pb(1)-O(13) <sup>#1</sup>         | 2.540(8)   |
| Pb(1)-O(7)                                     | 2.587(7)  | Pb(1)-O(12) <sup>#1</sup>         | 2.588(8)   |
| Pb(1)-O(8)                                     | 2.629(8)  |                                   |            |
| Pb(2')-O(8)                                    | 2.668(8)  | Pb(2)-O(13)                       | 2.296(7)   |
| Pb(2)-O(9)                                     | 2.444(8)  | Pb(2)-O(6) <sup>#1</sup>          | 2.532(9)   |
| Pb(2)-O(10)                                    | 2.642(8)  | Pb(2')-O(13)                      | 2.322(9)   |
| Na(1)-O(7)                                     | 2.249(9)  | Na(1)-O(12)                       | 2.253(8)   |
| Na(1)-O(4)                                     | 2.372(7)  | Na(1)-O(2)                        | 2.407(7)   |
| Na(1)-O(3)                                     | 2.414(7)  | Na(1)-O(1)                        | 2.463(7)   |
| O(13)-Pb(1)-O(13) <sup>#1</sup>                | 71.0(3)   | O(13)-Pb(1)-O(7)                  | 83.0(3)    |
| O(13) <sup>#1</sup> -Pb(1)-O(7)                | 77.7(3)   | O(13)-Pb(1)-O(12) <sup>#1</sup>   | 74.4(3)    |
| O(13) <sup>#1</sup> -Pb(1)-O(12) <sup>#1</sup> | 96.9(3)   | O(7)-Pb(1)-O(12) <sup>#1</sup>    | 157.2(3)   |
| O(13)-Pb(1)-O(8)                               | 76.8(3)   | O(13) <sup>#1</sup> -Pb(1)-O(8)   | 121.6(2)   |
| O(7)-Pb(1)-O(8)                                | 50.7(3)   | O(12) <sup>#1</sup> -Pb(1)-O(8)   | 119.6(3)   |
| O(13)-Pb(1)-Pb(2')                             | 37.9(2)   | O(13) <sup>#1</sup> -Pb(1)-Pb(2') | 107.38(18) |
| O(7)-Pb(1)-Pb(2')                              | 80.4(2)   | O(12) <sup>#1</sup> -Pb(1)-Pb(2') | 80.2(2)    |
| O(8)-Pb(1)-Pb(2')                              | 46.65(18) | Pb(2')-Pb(2)-O(13)                | 73.2(2)    |
| Pb(2')-Pb(2)-O(9)                              | 137.9(2)  | O(13)-Pb(2)-O(9)                  | 82.8(3)    |
| Pb(2')-Pb(2)-O(6) <sup>#1</sup>                | 128.4(3)  | O(13)-Pb(2)-O(6) <sup>#1</sup>    | 78.9(3)    |
| O(9)-Pb(2)-O(6) <sup>#1</sup>                  | 77.8(3)   | Pb(2')-Pb(2)-O(10)                | 90.4(3)    |

|                                 |          |                   |          |
|---------------------------------|----------|-------------------|----------|
| O(13)-Pb(2)-O(10)               | 83.8(3)  | O(9)-Pb(2)-O(10)  | 52.5(3)  |
| O(6) <sup>#1</sup> -Pb(2)-O(10) | 129.0(3) | O(13)-Pb(2')-O(8) | 76.2(3)  |
| O(7)-Na(1)-O(12)                | 93.9(3)  | O(7)-Na(1)-O(4)   | 148.6(3) |
| O(12)-Na(1)-O(4)                | 68.8(3)  | O(7)-Na(1)-O(2)   | 69.8(3)  |
| O(12)-Na(1)-O(2)                | 147.0(3) | O(4)-Na(1)-O(2)   | 137.6(3) |
| O(7)-Na(1)-O(3)                 | 120.4(3) | O(12)-Na(1)-O(3)  | 84.5(3)  |
| O(4)-Na(1)-O(3)                 | 85.1(3)  | O(2)-Na(1)-O(3)   | 80.1(2)  |
| O(7)-Na(1)-O(1)                 | 86.5(3)  | O(12)-Na(1)-O(1)  | 124.3(3) |
| O(4)-Na(1)-O(1)                 | 82.7(2)  | O(2)-Na(1)-O(1)   | 84.3(2)  |
| O(3)-Na(1)-O(1)                 | 140.9(2) |                   |          |

Symmetry codes for **4**: <sup>#1</sup> -x+y-1, -x+1, z; <sup>#2</sup> -y+1, x-y+2, z. For **5**: <sup>#1</sup> -x, y, -z+1/2. For **7**: <sup>#1</sup> -x+1, -y, -z; <sup>#2</sup> x+1, y+1, z. For **8**: <sup>#1</sup> -x-1, -y, z; <sup>#2</sup> x+1, y+1, z. For **9**: <sup>#1</sup> -x+2, -y, -z; <sup>#2</sup> x+1, y, z. For **10**: <sup>#1</sup> -x-2, -y, -z; <sup>#2</sup> -x-1, -y, -z; <sup>#3</sup> x+1, y, z. For **11**: <sup>#1</sup> x, y+1, z; <sup>#2</sup> -x+1, y, -z+3/2; <sup>#3</sup> x, y-1, z. For **12**: <sup>#1</sup> -x, y, -z+1/2; <sup>#2</sup> -x, -y+2, -z. For **13**: <sup>#1</sup> -x+2, -y+1, -z+2.

**Table S2.** Hydrogen-bonding parameters for **1-9**, **11** and **13** (in Å and deg)

|                   | D-H...A | d(D-H)    | d(D...A)  | ∠(D-H...A) |
|-------------------|---------|-----------|-----------|------------|
| <b>1</b>          |         |           |           |            |
| O(2)-H(2)···O(1)  | 0.82    | 1.97      | 2.517(5)  | 123.5      |
| O(3)-H(3)···O(2)  | 0.82    | 1.77      | 2.495(4)  | 146.5      |
| O(4)-H(4)···O(3)  | 0.86    | 1.97      | 2.757(4)  | 151.9      |
| O(5)-H(5A)···O(8) | 0.82    | 1.99      | 2.741(4)  | 152.3      |
| O(7)-H(7A)···O(6) | 0.81(2) | 1.79(3)   | 2.515(5)  | 148(6)     |
| O(6)-H(6A)···O(5) | 0.83(2) | 1.71(4)   | 2.493(6)  | 156(7)     |
| <b>2</b>          |         |           |           |            |
| O(2)-H(2A)···O(3) | 0.83(2) | 2.143(19) | 2.920(7)  | 156(4)     |
| O(4)-H(4A)···O(3) | 0.82    | 1.99      | 2.743(6)  | 152.8      |
| O(6)-H(6A)···O(8) | 0.82    | 1.78      | 2.506(6)  | 146.3      |
| O(1)-H(1A)···O(2) | 0.83(2) | 1.71(5)   | 2.487(6)  | 154(10)    |
| O(7)-H(7)···O(8)  | 0.82    | 1.74      | 2.536(6)  | 162.8      |
| <b>3</b>          |         |           |           |            |
| O(1)-H(1)···O(3)  | 0.82    | 1.88      | 2.559(9)  | 138.9      |
| O(6)-H(6A)···O(8) | 0.82    | 1.92      | 2.656(18) | 149.1      |
| O(7)-H(7A)···O(5) | 0.82    | 1.80      | 2.413(16) | 129.8      |

|                                     |           |           |            |           |
|-------------------------------------|-----------|-----------|------------|-----------|
| O(5)-H(5A)···O(8)                   | 0.82      | 2.06      | 2.754(17)  | 142.8     |
| <b>4</b>                            |           |           |            |           |
| O(3)-H(3A)···O(4)                   | 0.81(2)   | 1.988(19) | 2.750(11)  | 156(2)    |
| O(2)-H(2A)···O(3)                   | 0.83(2)   | 1.85(10)  | 2.597(10)  | 150(20)   |
| O(4)-H(4)···O(1)                    | 0.82(2)   | 1.90(4)   | 2.712(13)  | 170(17)   |
| C(2)-H(2)···O(3) <sup>#1</sup>      | 0.93      | 2.416(8)  | 3.34(1)    | 173(1)    |
| <b>5</b>                            |           |           |            |           |
| O(2)-H(2)···O(3)                    | 0.82      | 1.85      | 2.5835(18) | 148.1     |
| O(1)-H(1)···O(4)                    | 0.82      | 1.89      | 2.5678(17) | 138.7     |
| O(1W)-H(1WA)···O(4)                 | 0.856(18) | 2.36(3)   | 3.002(2)   | 132(3)    |
| N(3)-H(3D)···O(1W) <sup>#2</sup>    | 0.97      | 2.16      | 3.083(3)   | 159.8     |
| O(3)-H(3)···O(4)                    | 0.735(14) | 2.278(14) | 3.0113(19) | 175.1(17) |
| <b>6</b>                            |           |           |            |           |
| O(1)-H(1A)···O(4)                   | 0.82      | 1.95      | 2.668(6)   | 145.7     |
| O(2)-H(2A)···O(3)                   | 0.82      | 1.94      | 2.577(5)   | 133.8     |
| O(4)-H(4)···O(3)                    | 0.82      | 2.39      | 2.910(6)   | 121.6     |
| O(5)-H(5)···O(8)                    | 0.82      | 2.22      | 2.857(8)   | 134.3     |
| O(6)-H(6A)···O(7)                   | 0.82      | 1.82      | 2.486(8)   | 138.0     |
| O(8)-H(8)···O(5)                    | 0.82      | 2.30      | 2.857(8)   | 126.2     |
| <b>7</b>                            |           |           |            |           |
| O(1W)-H(1A)···O(3W)                 | 0.828(18) | 1.93(3)   | 2.690(5)   | 152(5)    |
| O(1W)-H(1B)···O(24)                 | 0.888(18) | 1.94(3)   | 2.753(3)   | 152(4)    |
| <b>8</b>                            |           |           |            |           |
| O(1W)-H(1A)···O(5W)                 | 0.866(19) | 1.84(2)   | 2.697(5)   | 173(5)    |
| O(1W)-H(1B)···O(24) <sup>#1</sup>   | 0.90(2)   | 1.96(3)   | 2.806(4)   | 155(5)    |
| O(25)-H(25A)···O(4W) <sup>#3</sup>  | 0.71(6)   | 2.41(6)   | 3.104(10)  | 164(8)    |
| O(25)-H(25A)···O(4W') <sup>#3</sup> | 0.71(6)   | 2.46(6)   | 3.104(12)  | 151(8)    |
| <b>9</b>                            |           |           |            |           |
| O(13)-H(13)···O(7W)                 | 0.813(19) | 2.34(2)   | 3.147(10)  | 174(4)    |
| O(1W)-H(1A)···O(11)                 | 0.86      | 1.83      | 2.650(4)   | 156.5     |
| O(1W)-H(1B)···O(7W)                 | 0.70      | 2.21      | 2.754(10)  | 135.6     |
| O(2W)-H(2A)···O(6) <sup>#3</sup>    | 0.97      | 1.82      | 2.775(4)   | 168.3     |
| O(2W)-H(2B)···O(8)                  | 0.82      | 2.54      | 3.076(4)   | 124.0     |
| O(3W)-H(3A)···O(8W) <sup>#1</sup>   | 0.85      | 2.02      | 2.839(6)   | 162.2     |
| O(3W)-H(3B)···O(5) <sup>#2</sup>    | 0.92      | 1.84      | 2.726(4)   | 160.2     |

|                               |           |          |          |        |
|-------------------------------|-----------|----------|----------|--------|
| O(4W)-H(4B)...O(6)            | 0.873(11) | 2.04(3)  | 2.876(4) | 160(6) |
| C(4)-H(4)...O1W <sup>#4</sup> | 0.93      | 2.885(2) | 3.536(5) | 128(1) |

### 11

|                                   |           |         |           |         |
|-----------------------------------|-----------|---------|-----------|---------|
| O(1W)-H(1C)...O(23)               | 0.89(2)   | 1.75(3) | 2.633(4)  | 171(11) |
| O(1W)-H(1D)...O(25)               | 0.88(2)   | 2.22(4) | 3.058(3)  | 158(9)  |
| O(2W)-H(2B)...O(18)               | 0.872(18) | 1.82(2) | 2.650(4)  | 158(4)  |
| O(2W)-H(2A)...O(25)               | 0.894(17) | 2.02(3) | 2.827(4)  | 150(3)  |
| O(2W)-H(2A)...O(19)               | 0.894(17) | 2.52(3) | 3.127(4)  | 126(2)  |
| O(3W)-H(3A)...O(2W)               | 0.843(18) | 2.00(3) | 2.807(4)  | 161(4)  |
| O(7W)-H(7B)...O(4W) <sup>#4</sup> | 0.92(2)   | 2.01(4) | 2.871(11) | 157(7)  |
| O(7W)-H(7A)...O(6)                | 0.92(2)   | 2.02(5) | 2.836(6)  | 148(8)  |

### 13

|                                   |      |          |           |          |
|-----------------------------------|------|----------|-----------|----------|
| C(14)-H(14B)...O(9) <sup>#2</sup> | 0.96 | 2.505(8) | 3.471(13) | 174.0(6) |
| C(36)-H(36B)...O(8) <sup>#2</sup> | 0.97 | 2.662(8) | 3.449(15) | 140(8)   |

Symmetry code for **4**: <sup>#1</sup> -1/3+x, 1/3+y, 1/3+z. For **5**: <sup>#2</sup> -x+1/2, -y+1/2, z-1/2. For **8**: <sup>#1</sup> -x-1, -y, -z; <sup>#3</sup> x, y+1, z. For **9**: <sup>#1</sup> -x+2, -y, -z; <sup>#2</sup> x+1, y, z; <sup>#3</sup> -x+1, -y, -z; <sup>#4</sup> 1+x, 1+y, 1+z. For **11**: <sup>#4</sup> -x+1, y+1, -z+3/2. For **13**: <sup>#2</sup> x, y+1, z.

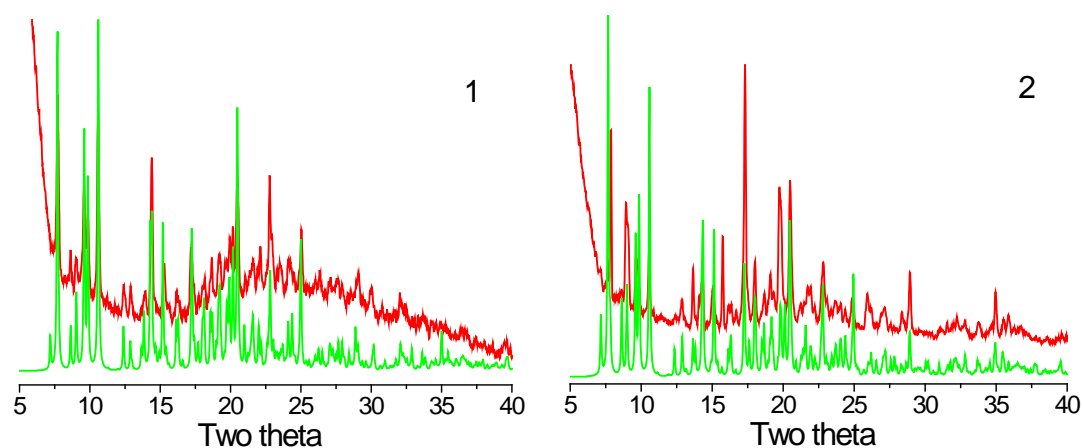

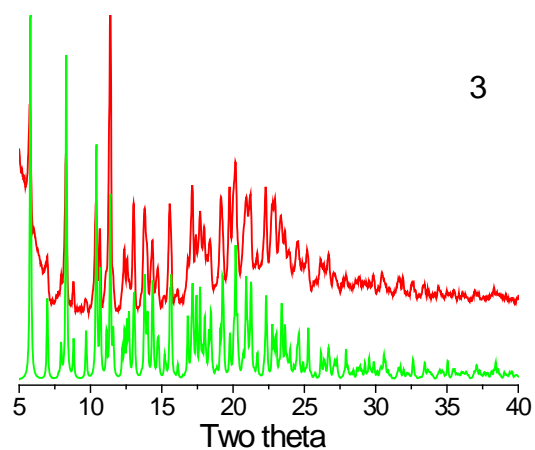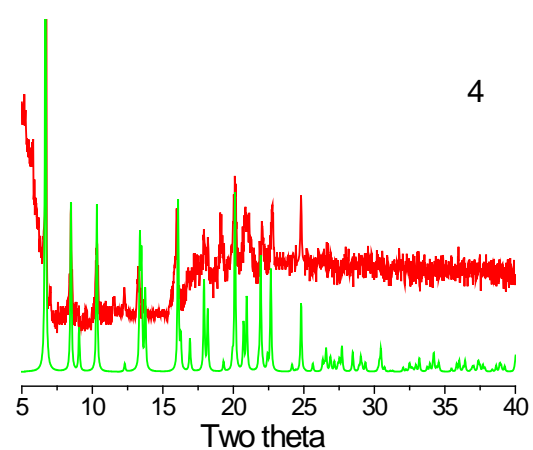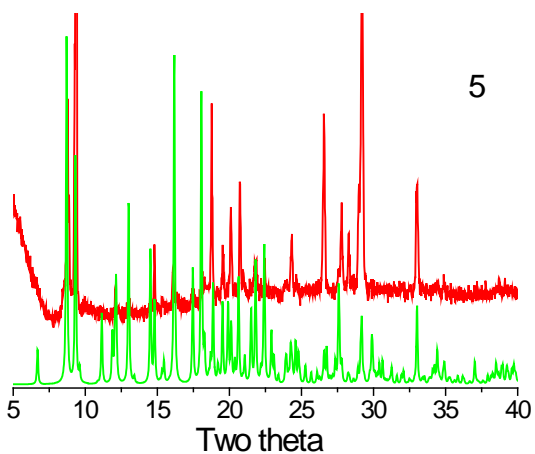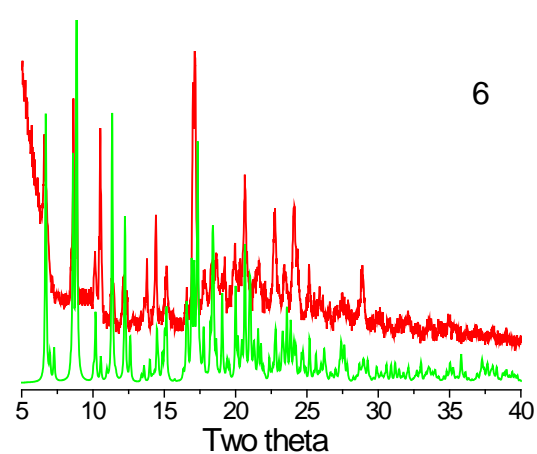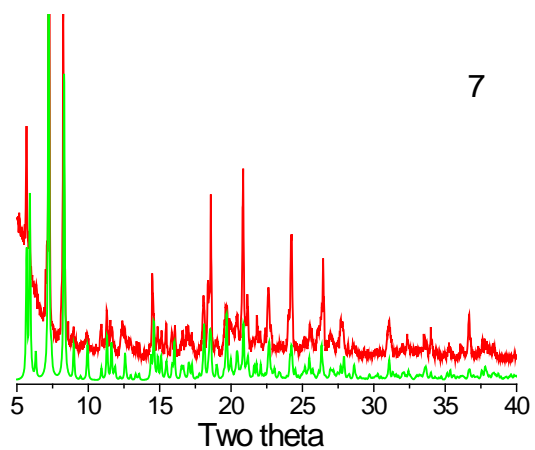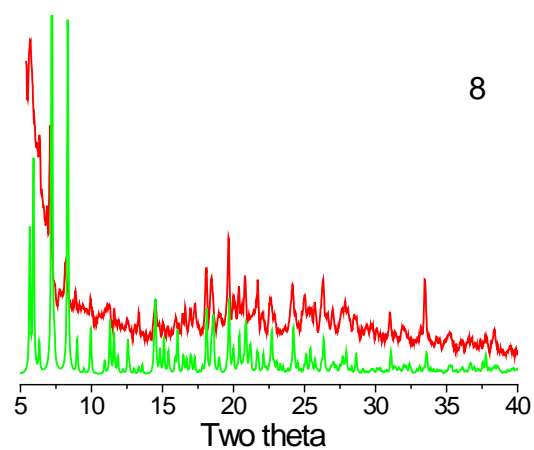

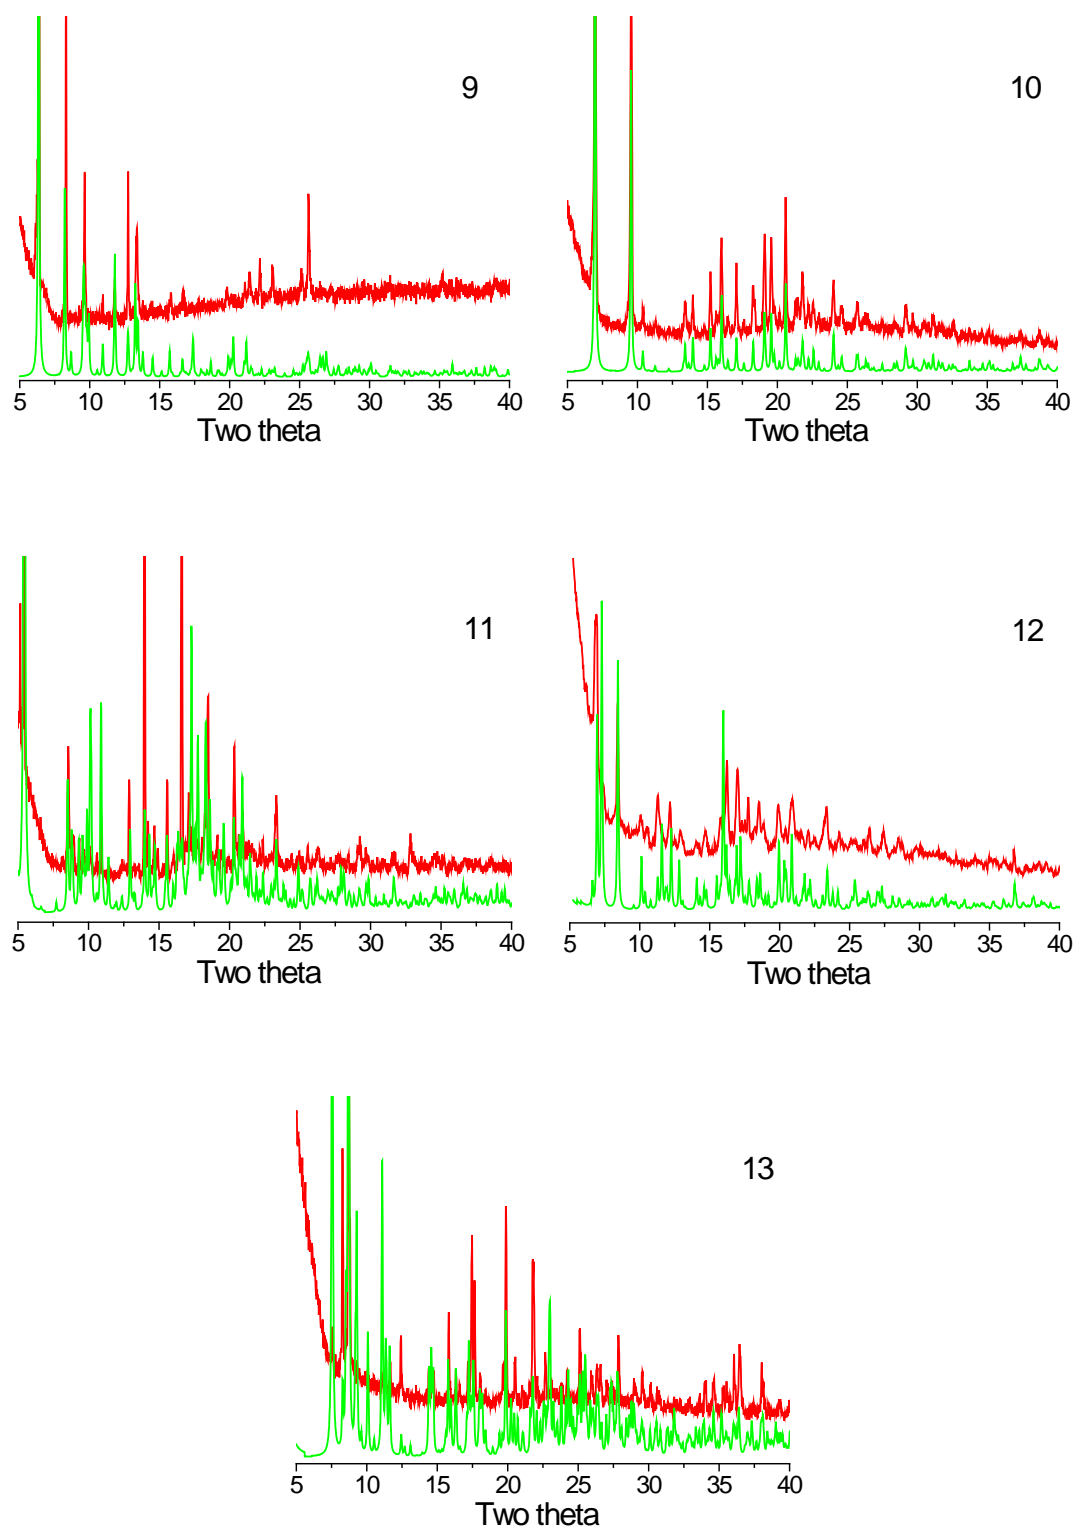

**Fig. S1.** The simulated (green) and experimental (red) XRPD patterns for the compounds **1-13** (the diffraction peaks of both simulated and experimental patterns match well in relevant positions, indicating that the phase purities of compounds **1-13** are good).



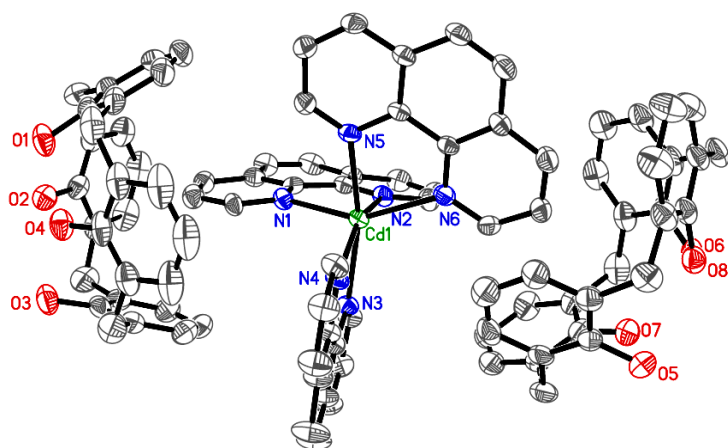

**Fig. S2.** The coordination environment of Cd(II) atom in **2**.

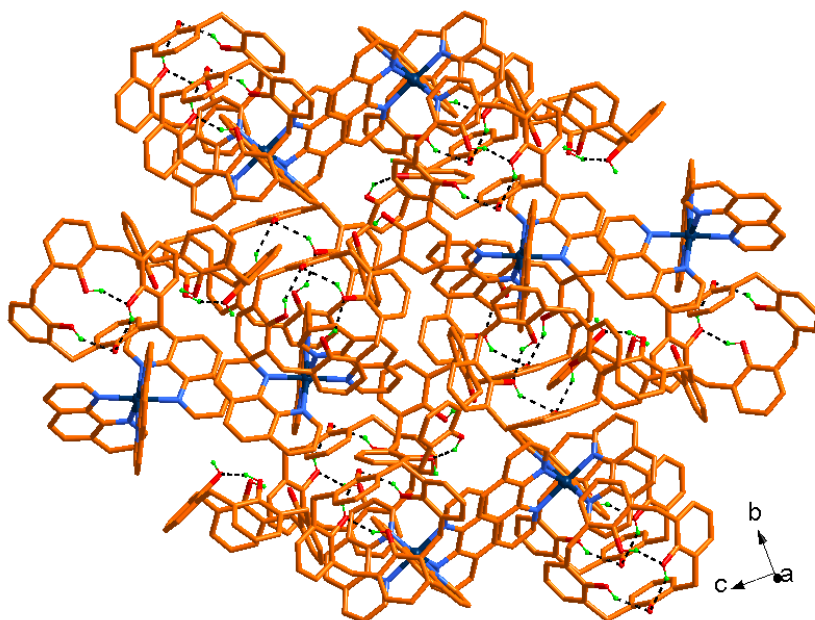

**Fig. S3.** The 3D supramolecular structure connected by C-H... $\pi$  interactions in **3**.

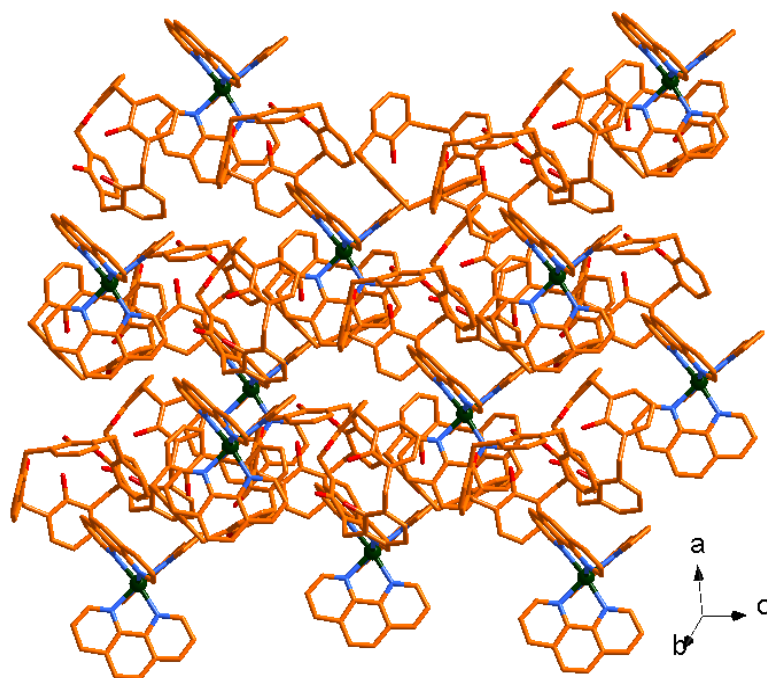

**Fig. S4.** The 3D supramolecular structure constructed by C-H...O and C-H... $\pi$  interactions in **4**.

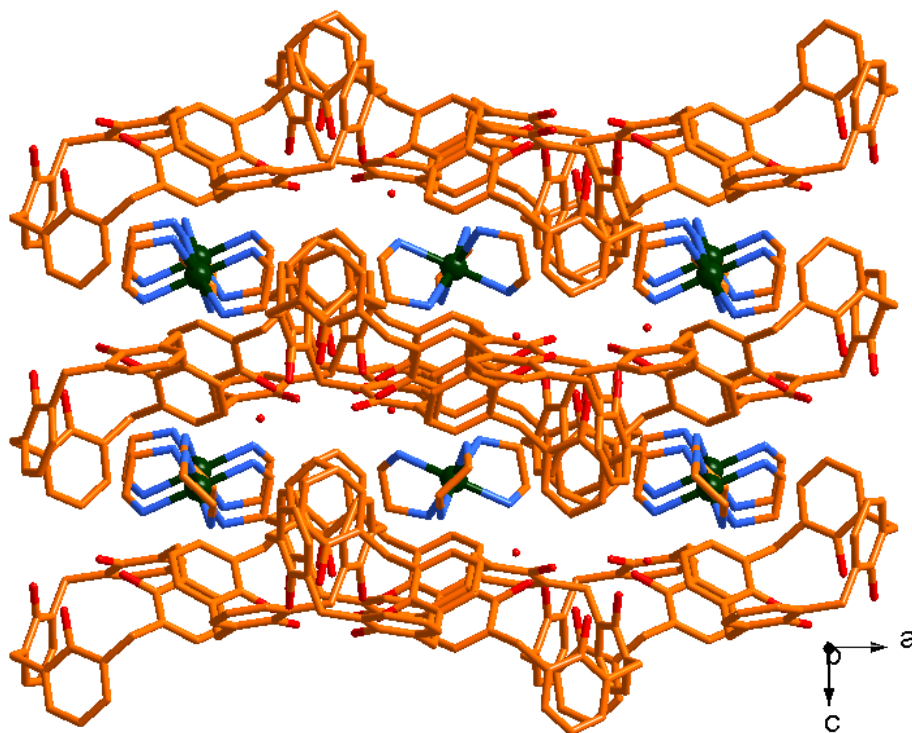

**Fig. S5.** The 3D supramolecular structure connected by intermolecular hydrogen-bonding interactions in **5**.

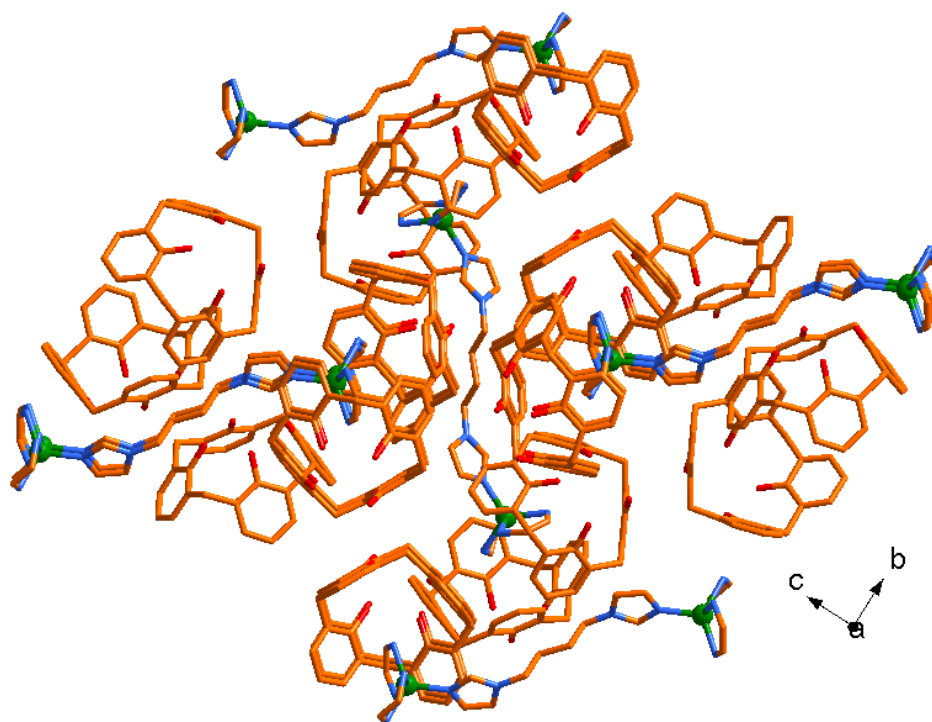

**Fig. S6.** The 3D supramolecular structure constructed by  $\pi$ - $\pi$  interactions in **6**.

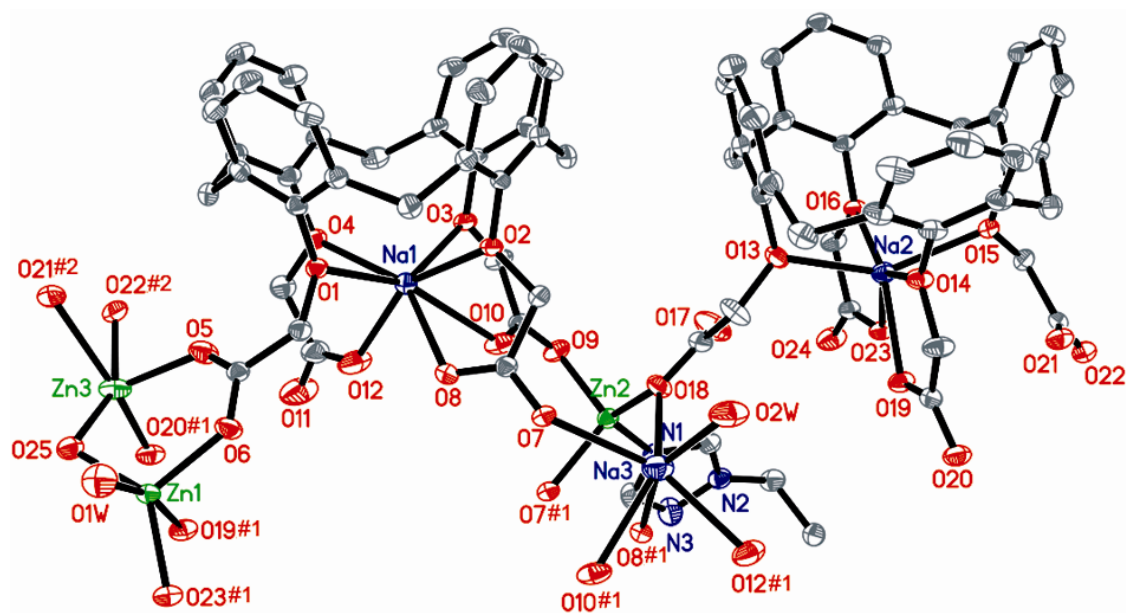

**Fig. S7.** ORTEP diagram showing the coordination environments of Zn(II) and Na(I) atoms in **8**. Symmetry codes: <sup>#1</sup>  $-x+1, -y, -z$ ; <sup>#2</sup>  $x+1, y+1, z$ .

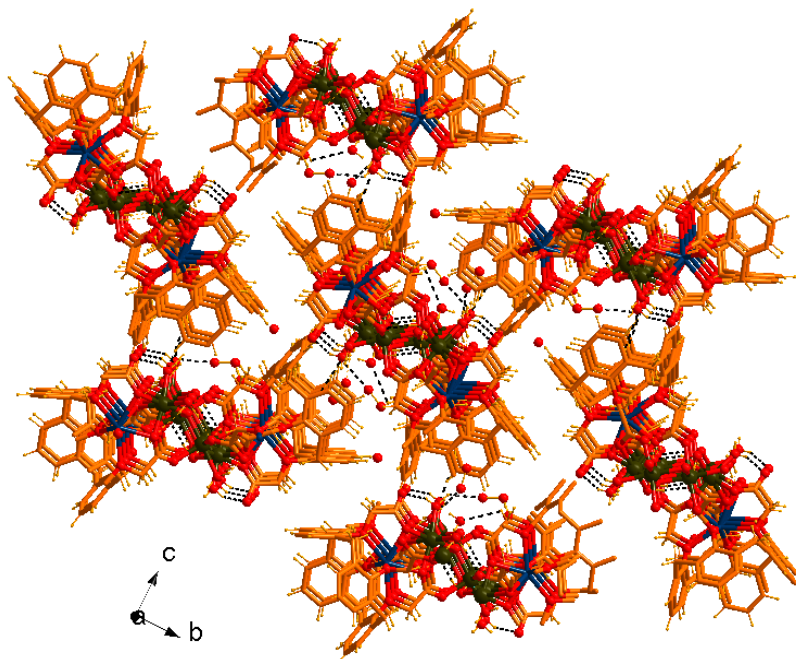

**Fig. S8.** The 3D supramolecular structure constructed by O-H...O and C-H...O interactions in **9**.

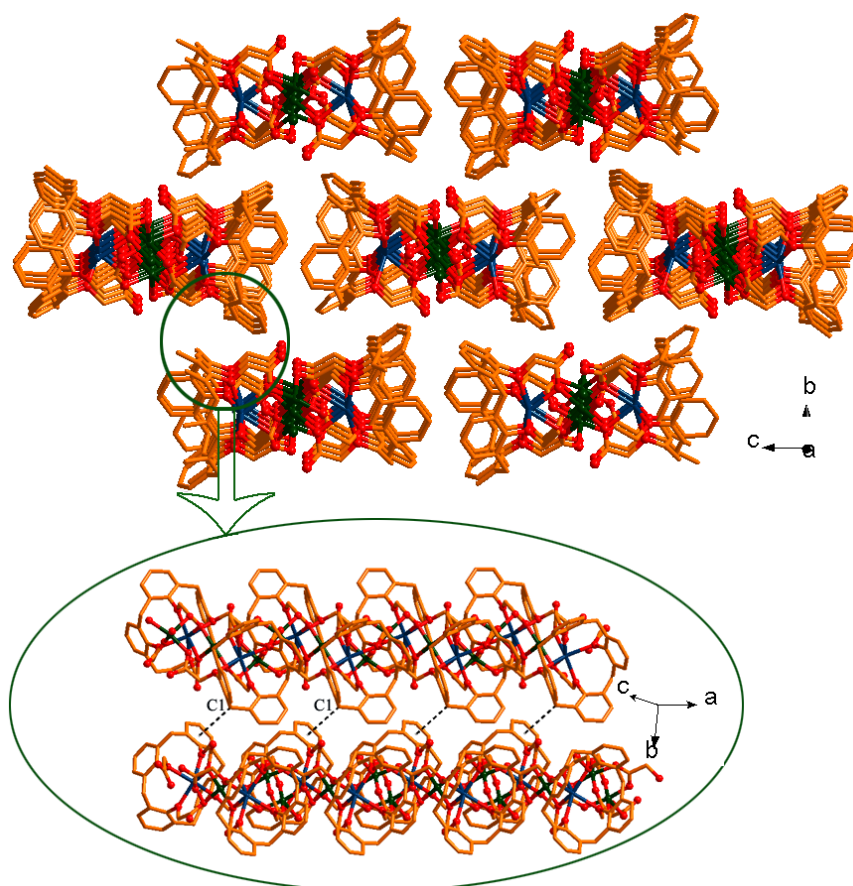

**Fig. S9.** The 3D supramolecular structure connected by C-H... $\pi$  interactions in **10**.

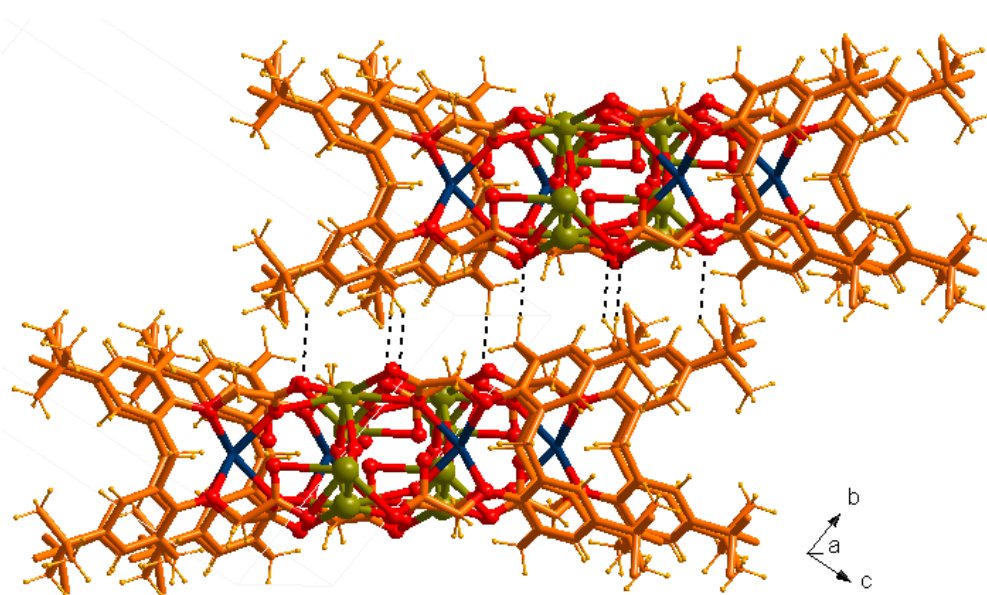

**Fig. S10.** The 1D supramolecular chain connected by C-H...O interactions in **13**.
